# Supplementary material for: Novel phosphorescent iridium(iii) emitters for both vacuum-deposition and inkjet-printing of OLEDs with exceptionally high efficiency
Source: Royal Society of Chemistry journal article supplement (doi:10.1039/c9tc00441f), 2019-01-01
Supplement: c9tc00441f1.pdf [file c9tc00441f1.pdf]

## Supplementary Information

### **Novel Phosphorescent iridium (III) emitters for both vacuum-deposition and inkjet-printing of OLEDs with exceptionally high efficiency**

Yong-Xu Hu<sup>a</sup>, Tong Lin<sup>b</sup>, Xin Xia<sup>a</sup>, Wan-Ying Mu<sup>b</sup>, Yu-ling Sun<sup>b</sup>, Wen-Ze He<sup>a</sup>, Chang-Ting Wei<sup>b</sup>, Dong-Yu Zhang<sup>b,\*</sup>, Xiao Li<sup>a,\*</sup>, and Zheng Cui<sup>b</sup>

<sup>a</sup>School of Chemical Engineering, University of Science and Technology Liaoning (USTL),  
Anshan 114051, People's Republic of China

<sup>b</sup>Printable electronics research center (PERC), Suzhou Institute of Nano-Tech and Nano-Bionics,  
Chinese Academy of Science, Suzhou 215123, China

\* Corresponding authors. E-mails: xiaoli@ustl.edu.cn; (X. Li); dyzhang2010@sinano.ac.cn (D. Zhang).

## Contents

- Scheme S1** Synthetic routes for (fpbt)<sub>2</sub>Ir(acac) and (fpbm)<sub>2</sub>Ir(acac).
- Figure S1.** HRMS, <sup>1</sup>H NMR and <sup>13</sup>C NMR spectra of fpbt.
- Figure S2.** HRMS, <sup>1</sup>H NMR and <sup>13</sup>C NMR spectra of fpbm.
- Figure S3.** HRMS, <sup>1</sup>H NMR and <sup>13</sup>C NMR spectra of (fpbt)<sub>2</sub>Ir (acac).
- Figure S4.** HRMS, <sup>1</sup>H NMR and <sup>13</sup>C NMR spectra of (fpbm)<sub>2</sub>Ir (acac).
- Figure S5.** The EL properties of the (fpbt)<sub>2</sub>Ir(acac)-based OLEDs with different doping concentration.
- Figure S6.** The EL properties of the (fpbm)<sub>2</sub>Ir(acac)-based OLEDs with different doping concentration.
- Figure S7.** a) EL spectra of (fpbt)<sub>2</sub>Ir(acac)-doped OLEDs at different voltage and b) EL spectra of (fpbm)<sub>2</sub>Ir(acac)-doped OLEDs at different voltage.
- Figure S8.** EL properties of the 10%-(bt)<sub>2</sub>Ir(acac)-doped OLEDs.
- Figure S9.** (fpbm)<sub>2</sub>Ir(acac)-based OLEDs with different processing method: a) EL spectra at 10 V; b) J-V-L characteristic; c) CE and PE versus luminance curves; d) EQE versus luminance curves.
- Figure S10.** Contact angles (CA) images of water drop on PEDOT: PSS and EMLs with different processing methods.
- Table S1.** The rheological properties of the solvents and the inks.
- Table S2.** Design of OLEDs with different processing method.
- Table S3.** EL properties of the (fpbm)<sub>2</sub>Ir(acac)-based OLEDs with different processing method.

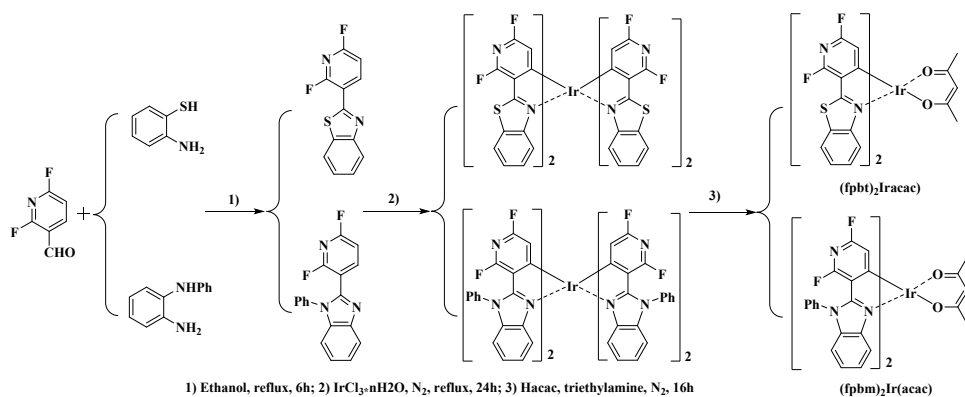

**Scheme S1** Synthetic routes for the (fpbt)<sub>2</sub>Ir(acac) and (fpbm)<sub>2</sub>Ir(acac)

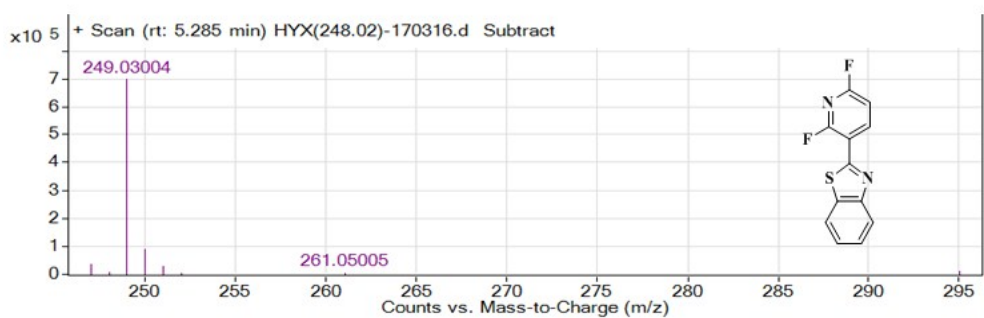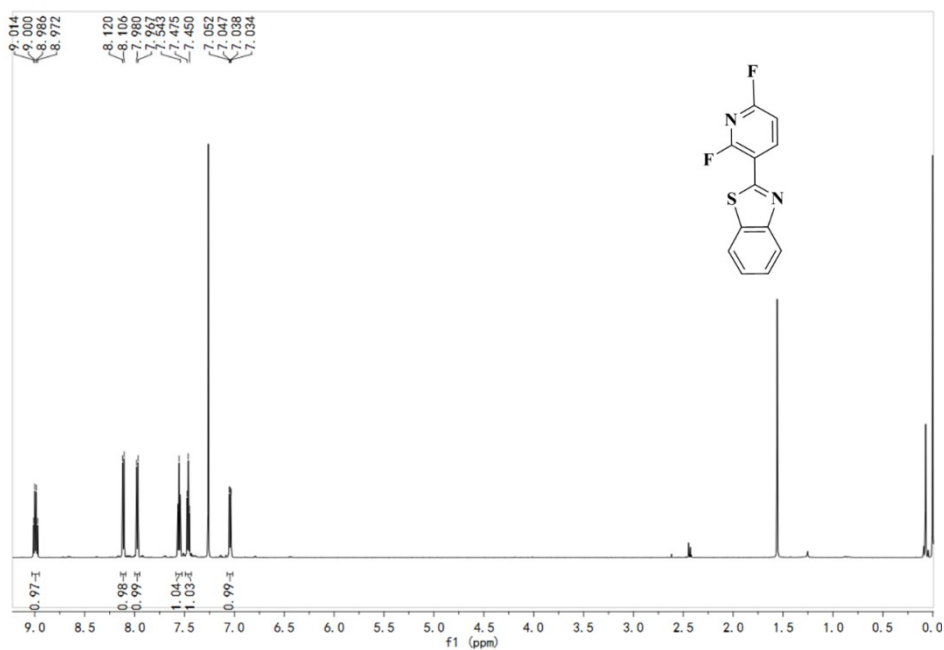

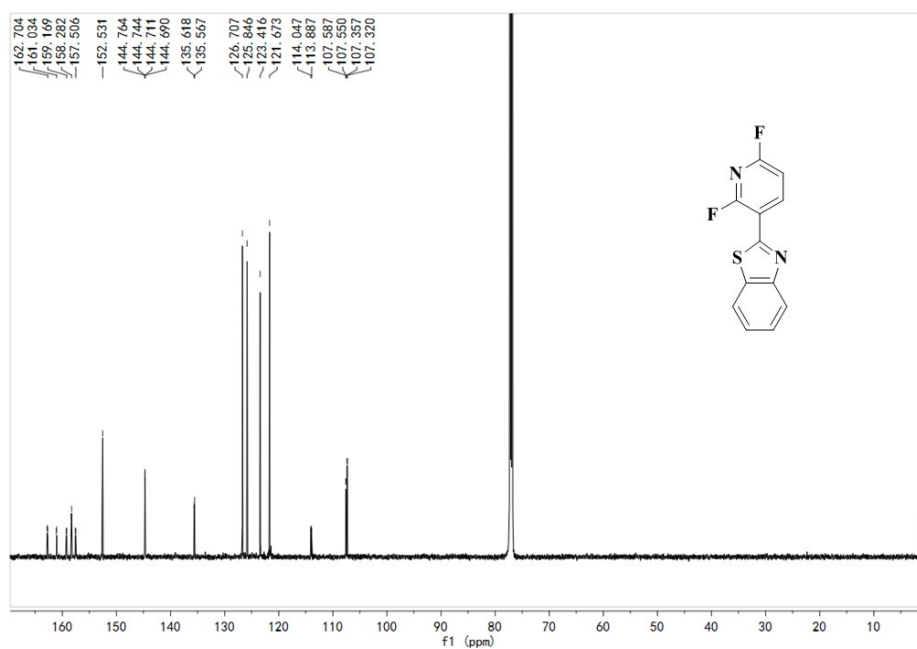

Figure S1 HRMS, <sup>1</sup>H NMR and <sup>13</sup>C NMR spectra of fbt.

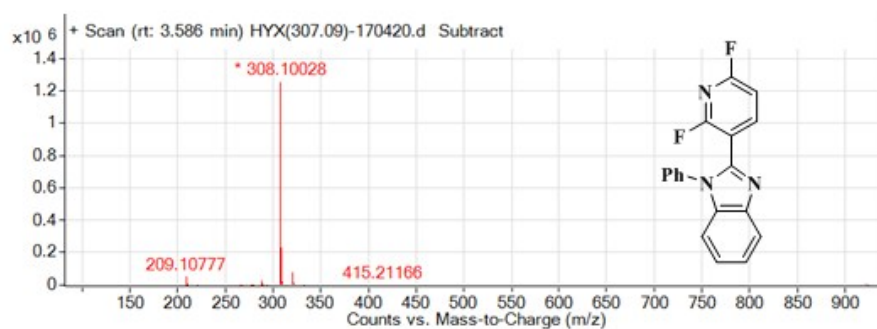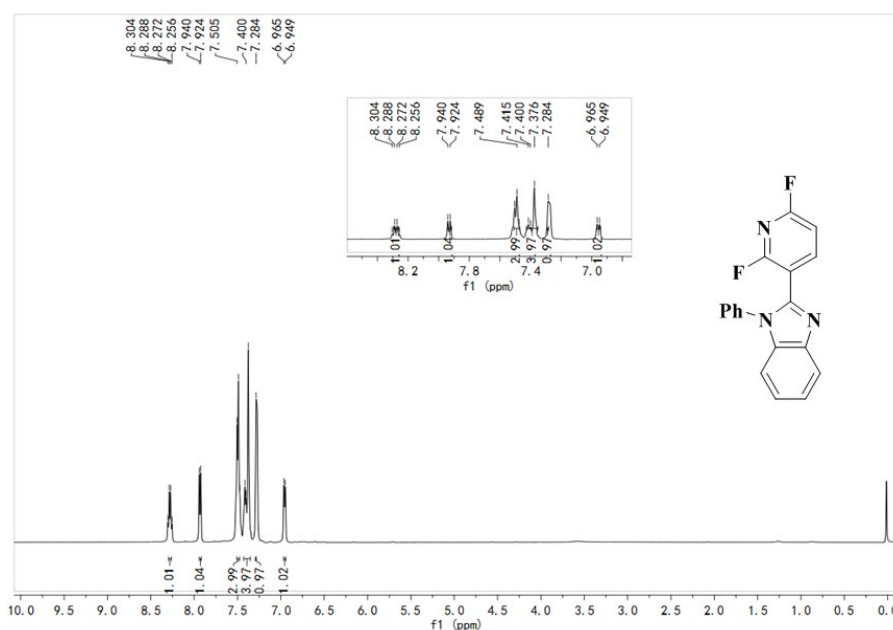

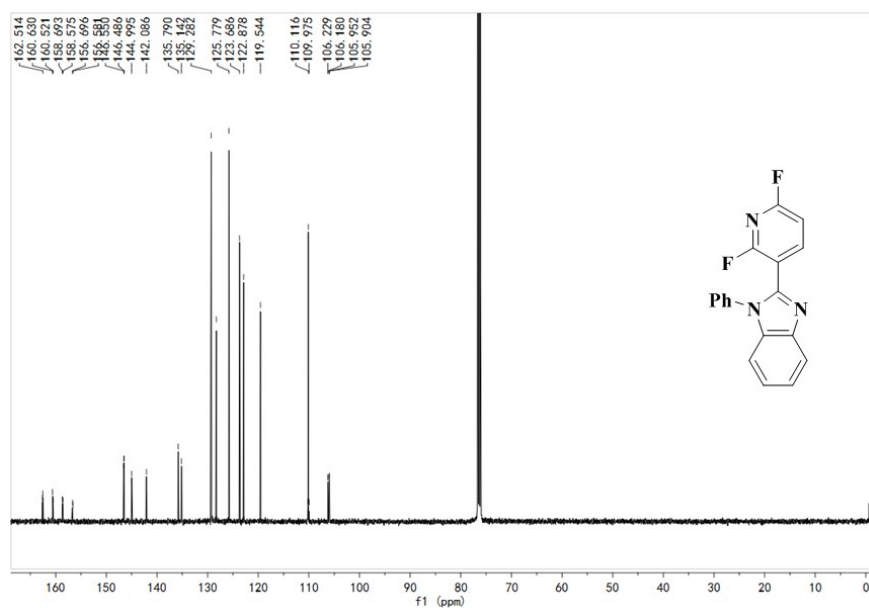

**Figure S2** HRMS, <sup>1</sup>H NMR and <sup>13</sup>C NMR spectra of fpbm.

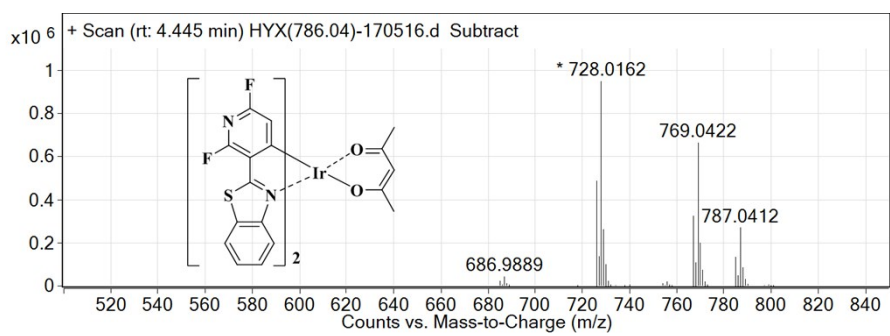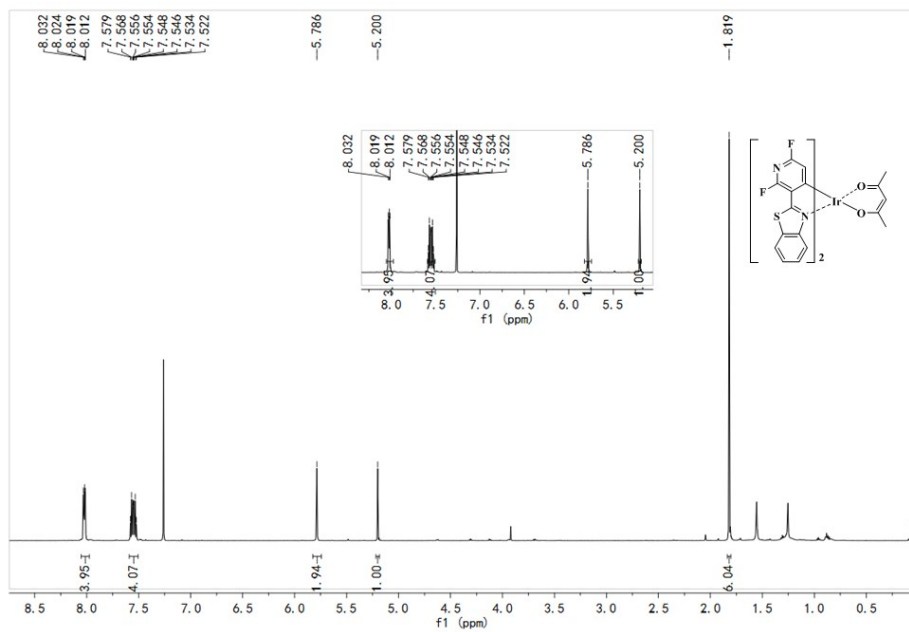

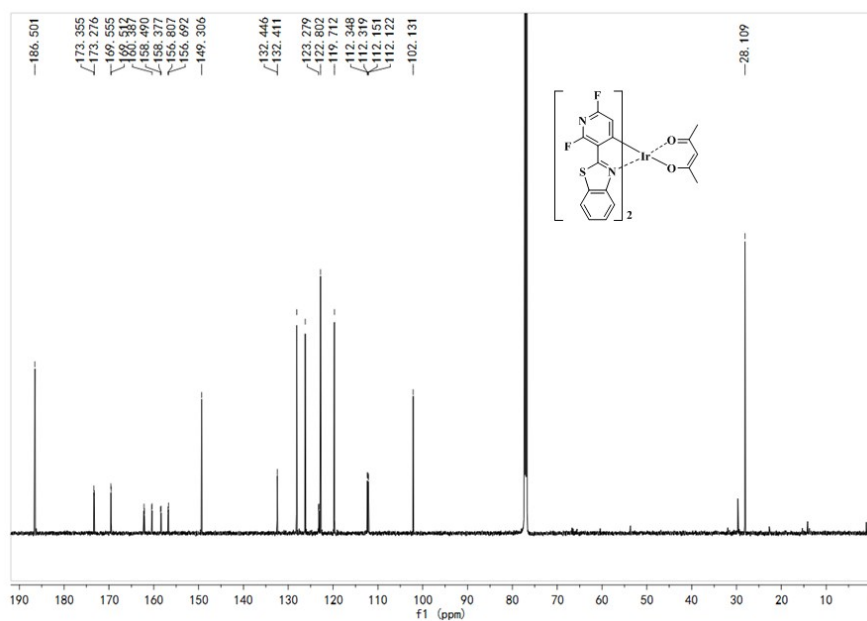

Figure S3 HRMS,  $^1\text{H}$  NMR and  $^{13}\text{C}$  NMR spectra of  $(\text{fpbt})_2\text{Ir}(\text{acac})$ .

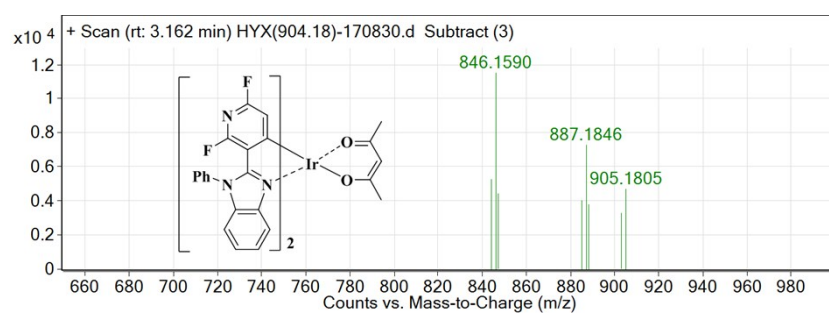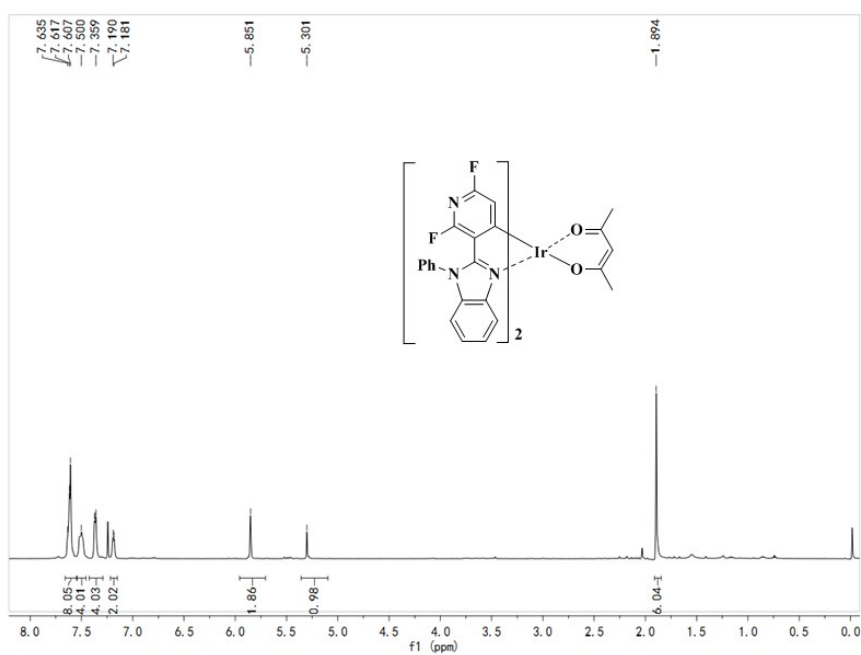

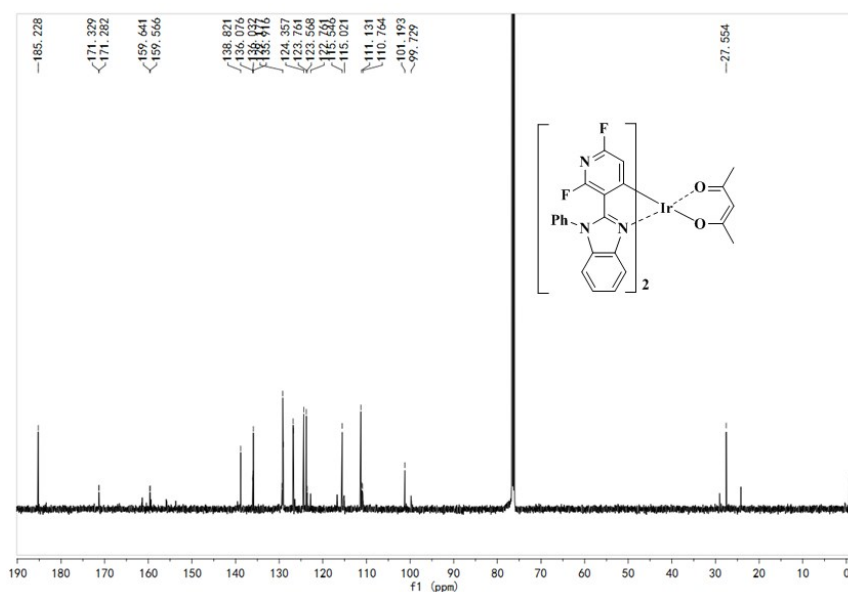

Figure S4 HRMS,  $^1\text{H}$  NMR and  $^{13}\text{C}$  NMR spectra of  $(\text{fpbm})_2\text{Ir}(\text{acac})$ .

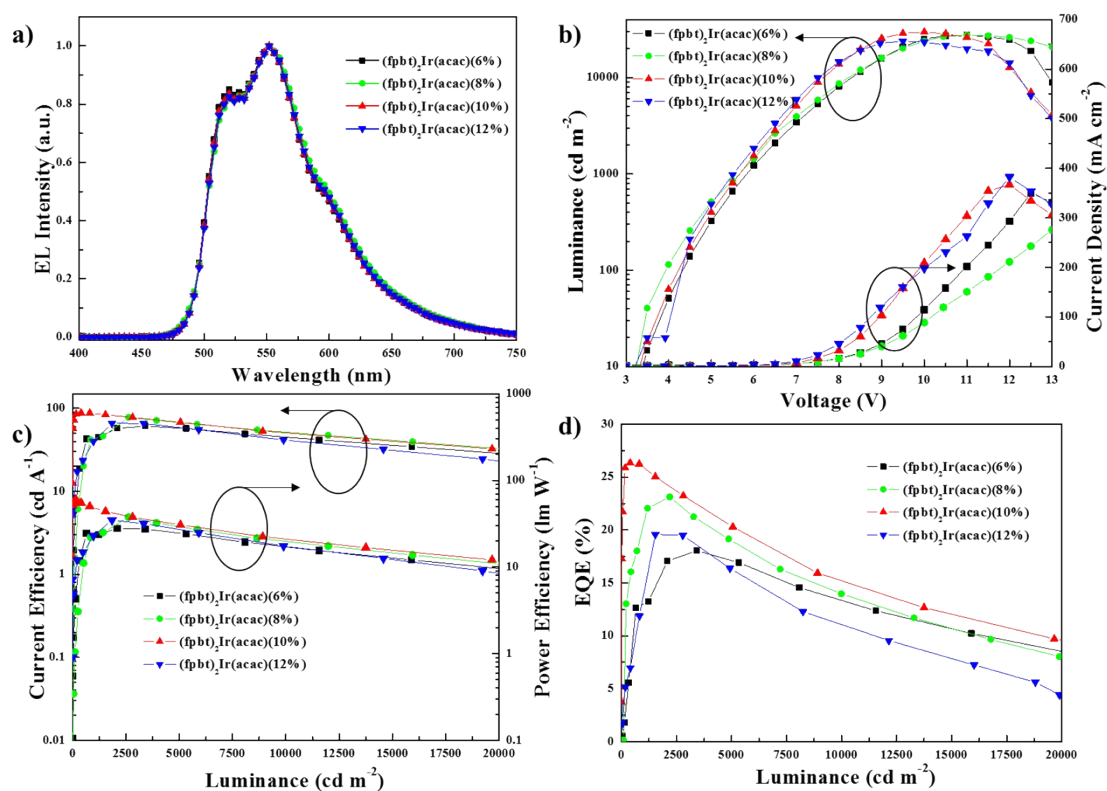

Figure S5 The EL properties of the  $(\text{fpbt})_2\text{Ir}(\text{acac})$ -based OLEDs with different doping concentration.

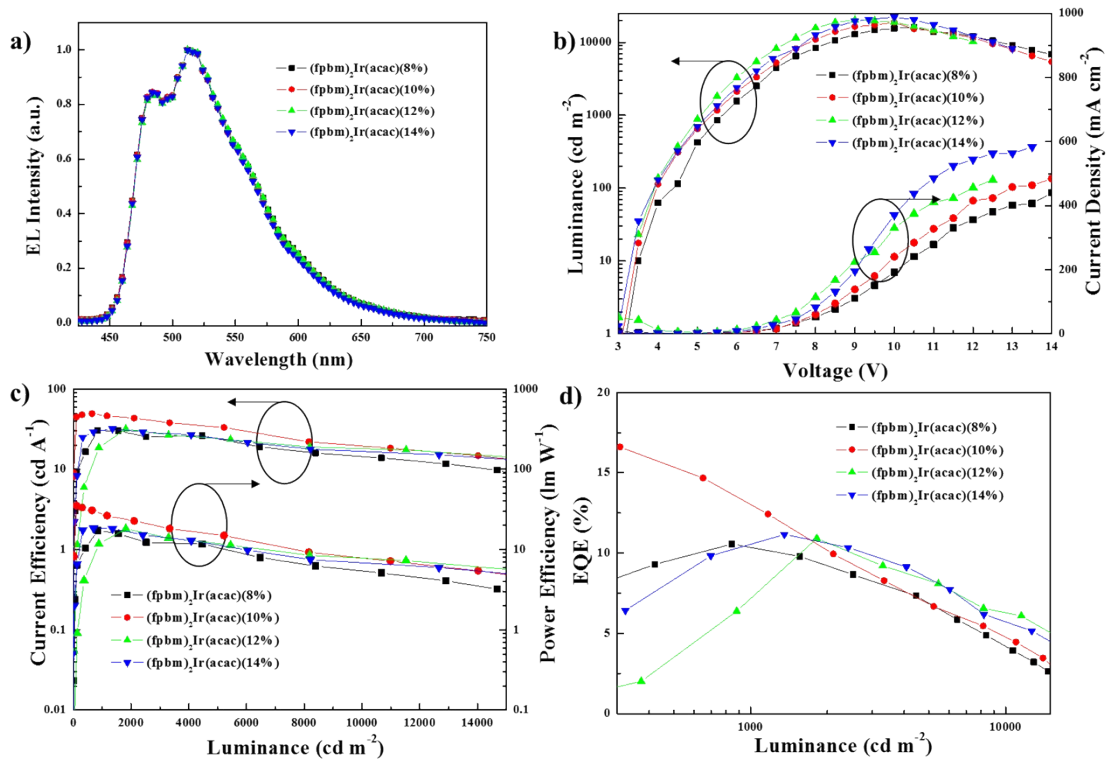

**Figure S6** The EL properties of the  $(\text{fpbm})_2\text{Ir}(\text{acac})$ -based OLEDs with different doping concentration.

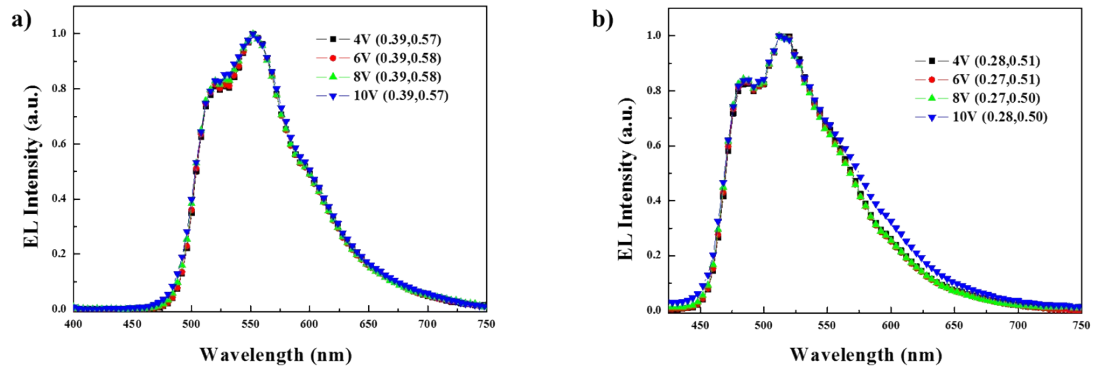

**Figure S7** a) EL spectra of  $(\text{fpbt})_2\text{Ir}(\text{acac})$ -doped OLEDs at different voltage and b) EL spectra of  $(\text{fpbm})_2\text{Ir}(\text{acac})$ -doped OLEDs at different voltage.



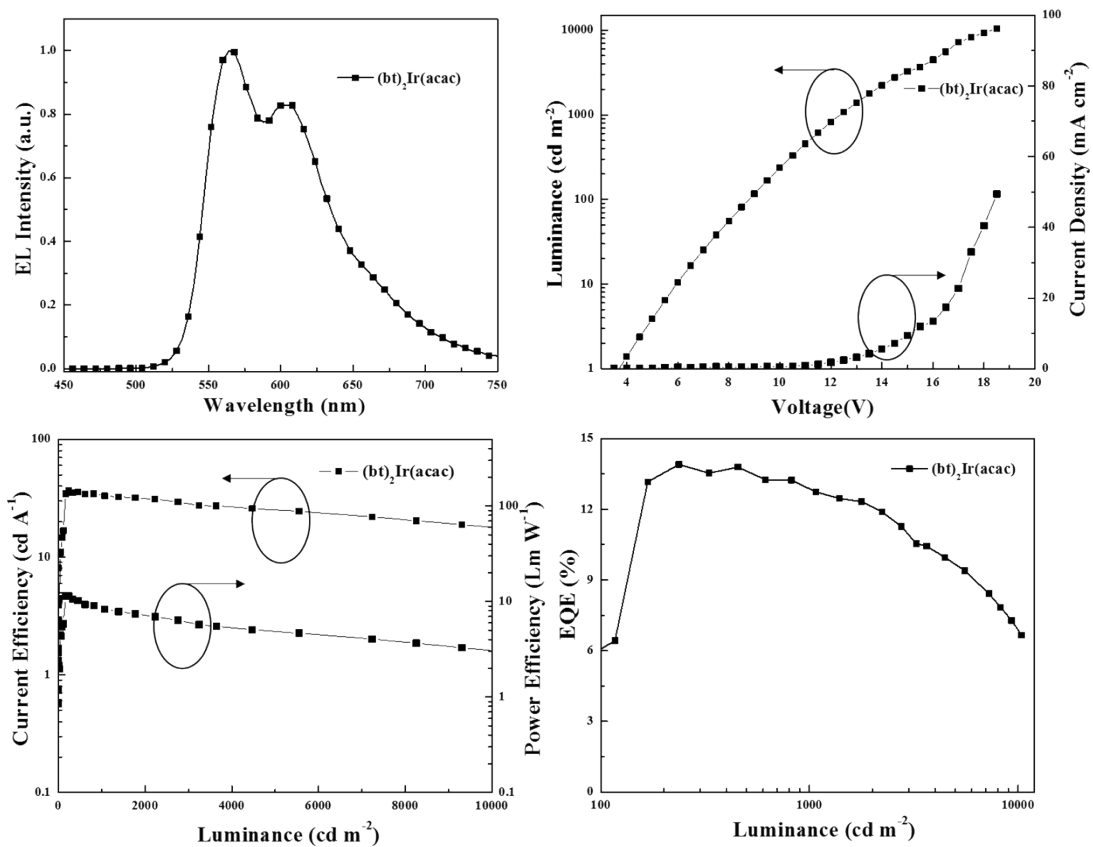

Figure S8 EL properties of the 10%-(bt)<sub>2</sub>Ir(acac)-doped OLEDs.

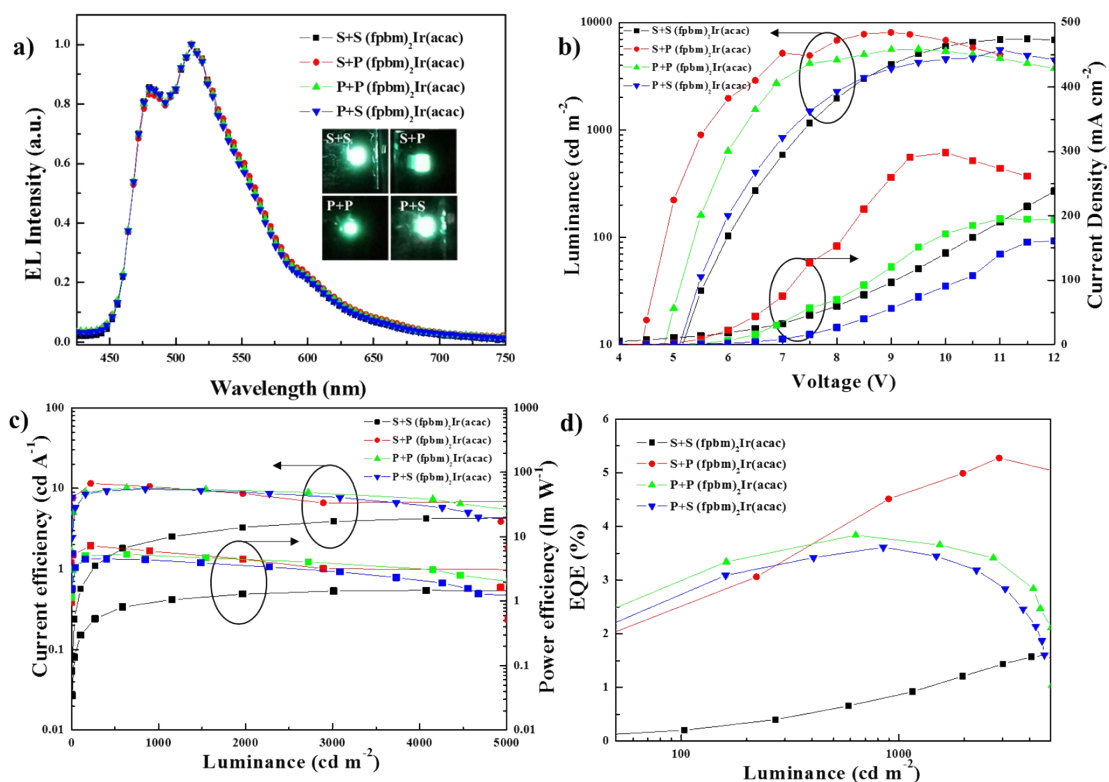

**Figure S9** (fpbm)<sub>2</sub>Ir(acac)-based OLEDs with different processing method: a) EL spectra at 10 V; b) J-V-L characteristic; c) CE and PE versus luminance curves; d) EQE versus luminance curves.

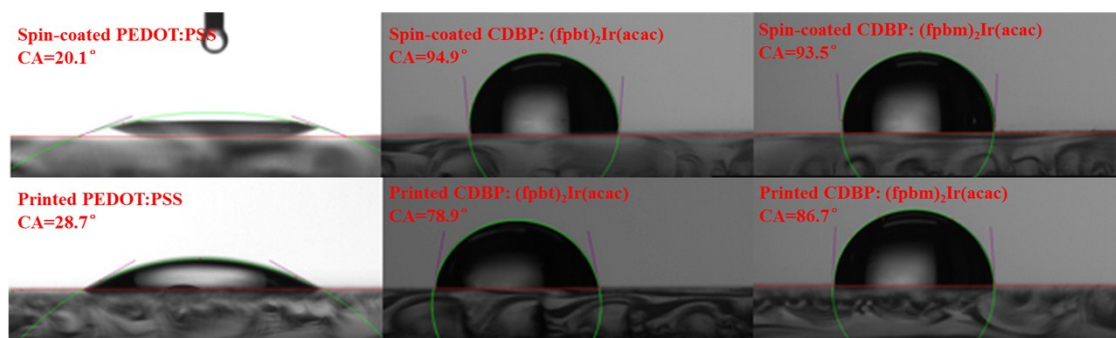

**Figure S10** Contact angles (CA) images of water drop on PEDOT: PSS and EMLs with different processing methods.

**Table S1** The rheological properties of the solvents and the inks.<sup>a)</sup>

| Solvent                                        | Boiling point (°C) | Viscosity(cp) | Surface tension (Mn m <sup>-1</sup> ) | Density(g cm <sup>-3</sup> ) | Z    |
|------------------------------------------------|--------------------|---------------|---------------------------------------|------------------------------|------|
| PEDOT:PSS                                      | 100                | 7.40          | 65.7                                  | 1.03                         | 5.1  |
| Ethylene glycol                                | 197                | 14.83         | 47.9                                  | 1.14                         | 2.3  |
| Ink- PEDOT:PSS <sup>b)</sup>                   | -                  | 20.00         | 52.3                                  | 1.13                         | 1.8  |
| Ink-(fpbt) <sub>2</sub> Ir(acac) <sup>c)</sup> | -                  | 2.48          | 26.2                                  | 1.03                         | 9.3  |
| Ink-(fpbm) <sub>2</sub> Ir(acac) <sup>d)</sup> | -                  | 2.99          | 27.1                                  | 1.03                         | 7.9  |
| chlorobenzene                                  | 132                | 0.76          | 33.6                                  | 1.11                         | 36.7 |
| Butyl Benzoate                                 | 250                | 2.70          | 33.4                                  | 1.01                         | 8.7  |

<sup>a)</sup> Data measured at 25°C; <sup>b)</sup> Ink-PEDOT: PSS : the volume ratio of PEDOT: PSS and ethylene glycol is 1:3; <sup>c)</sup> Ink-(fpbt)<sub>2</sub>Ir(acac) : the weight ratio of (fpbt)<sub>2</sub>Ir(acac) : CDBP is 1:9 in Butyl Benzoate; <sup>d)</sup> Ink-(fpbm)<sub>2</sub>Ir(acac) : the weight ratio of (fpbm)<sub>2</sub>Ir(acac) : CDBP is 1:9 in Butyl Benzoate.

**Table S2** Design of OLEDs with different processing method.

| process | PEDOT:PSS                  | EML(CDBP: (fpbt) <sub>2</sub> Ir(acac)) | EML(CDBP: (fpbm) <sub>2</sub> Ir(acac)) |
|---------|----------------------------|-----------------------------------------|-----------------------------------------|
| S+S     | Spin-coating <sup>a)</sup> | Spin-coating (90:10) <sup>c)</sup>      | Spin-coating (90:10) <sup>c)</sup>      |
| S+P     | Spin-coating               | Printing (90:10)                        | Printing (90:10)                        |
| P+P     | Printing <sup>b)</sup>     | Printing (90:10) <sup>d)</sup>          | Printing (90:10) <sup>d)</sup>          |
| P+S     | Printing                   | Spin-coating (90:10)                    | Spin-coating (90:10)                    |

<sup>a)</sup> Spin-coating PEDOT: PSS: Spin-coating onto the ITO glass substrate and baked in air at 120°C for 10 min; <sup>b)</sup> Printing PEDOT: PSS: Printing Ink- PEDOT:PSS onto the ITO glass substrate and baked in air at 120°C for 10 min; <sup>c)</sup> Spin-coating EML: Spin-coating EML (the weight ratio of Phosphorescent materials : CDBP is 1:9 in chlorobenzene) onto the PEDOT: PSS and baked in vacuum at 60°C for 15 min; <sup>d)</sup> Printing EML: Printing Ink-EML onto the PEDOT: PSS and baked in vacuum at 60°C for 15 min.

**Table S3** EL properties of the (fpbm)<sub>2</sub>Ir(acac)-based OLEDs with different processing method.

| Methods | $V_{\text{turnon}}$ (V) <sup>a)</sup> | $L_{\text{max}}$ (cd m <sup>-2</sup> ) <sup>b)</sup> | EQE (%) <sup>c)</sup> | CE(cd A <sup>-1</sup> ) <sup>c)</sup> | PE (lm W <sup>-1</sup> ) <sup>c)</sup> | CIE (x,y) <sup>d)</sup> |
|---------|---------------------------------------|------------------------------------------------------|-----------------------|---------------------------------------|----------------------------------------|-------------------------|
| S+S     | 4.5                                   | 7047                                                 | 1.6/0.2/0.9           | 4.4/0.6/2.5                           | 1.5/0.3/1.1                            | (0.28, 0.49)            |
| S+P     | 4.0                                   | 8096                                                 | 5.3/3.1/4.5           | 11.5/11.0/9.2                         | 7.3/6.9/6.5                            | (0.26, 0.49)            |
| P+P     | 4.5                                   | 5648                                                 | 3.8/3.3/3.7           | 10.2/8.8/9.6                          | 5.4/4.9/4.8                            | (0.27, 0.49)            |
| P+S     | 4.0                                   | 5560                                                 | 3.6/3.1/3.4           | 9.9/8.5/9.4                           | 4.5/4.2/4.1                            | (0.28, 0.49)            |

<sup>a)</sup> Turn-on voltage at 1 cd m<sup>-2</sup>; <sup>b)</sup> Maximum luminance; <sup>c)</sup> Order of measured efficiency values: maximum, then values at 100/1000 cd m<sup>-2</sup> for device; <sup>d)</sup> Commission International de l'Eclairage (CIE) coordinate measured at 10V.
